# Supplementary material
Source: publisher figshare collection journal article supplement (https://acs.figshare.com/ndownloader/files/23707641)
Supplement: Supplementary file 1 [file 23707641]

## Supporting Information

### A Ternary Electrification Layered Architecture for High Performance Triboelectric Nanogenerators

*Weili Deng,<sup>†,‡</sup> Yihao Zhou,<sup>†,‡</sup> Xun Zhao,<sup>†,‡</sup> Songlin Zhang,<sup>†</sup> Yongjiu Zou,<sup>†</sup> Jing Xu,<sup>†</sup>*

*Min-Hsin Yeh,<sup>¶,\*</sup> Hengyu Guo,<sup>§,\*</sup> Jun Chen,<sup>†,\*</sup>*

<sup>†</sup>Department of Bioengineering, University of California, Los Angeles, Los Angeles, California 90095, USA

<sup>§</sup> Department of Applied Physics, Chongqing University, Chongqing 400044, China

<sup>¶</sup> Department of Chemical Engineering, National Taiwan University of Science and Technology, Taipei 10607, Taiwan

<sup>‡</sup>These authors contributed equally to this work.

\*Correspondence to: jun.chen@ucla.edu (J.C.); ghyphysics@cqu.edu.cn (H.G.); mhyeh@mail.ntust.edu.tw (M-H. Y.)

**Supporting Figures:**

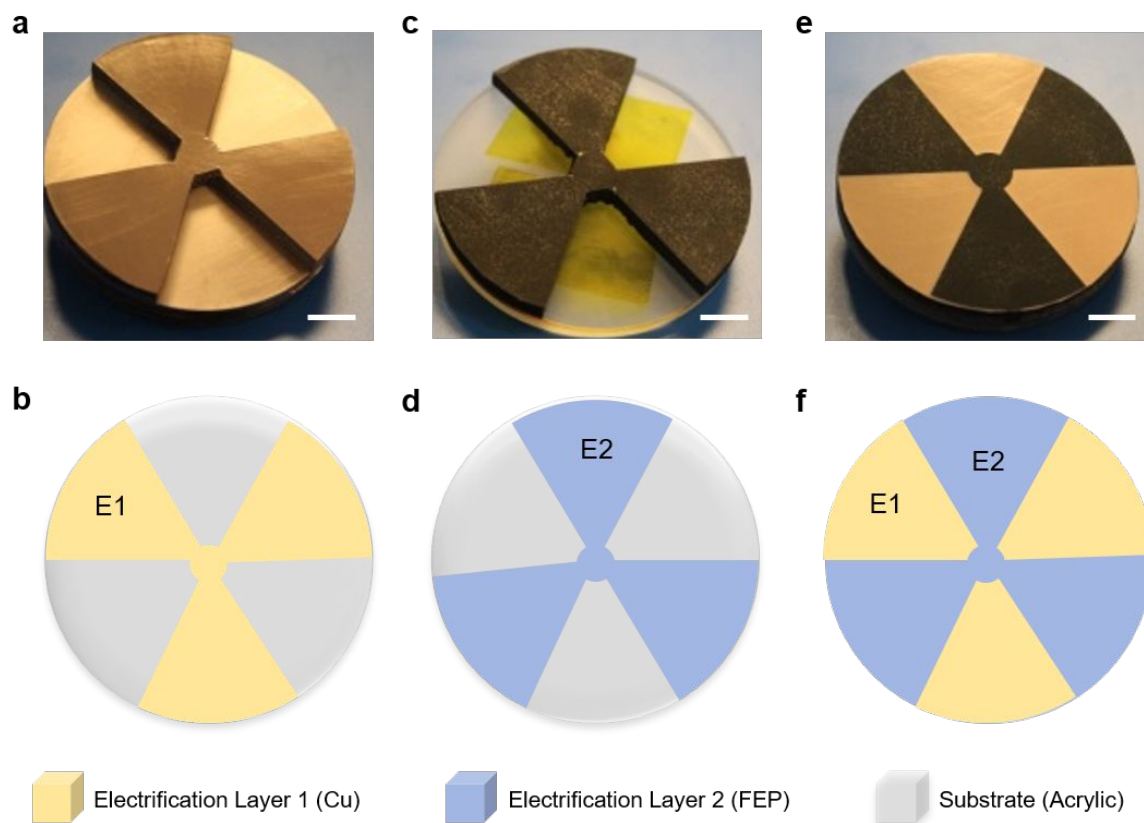

**Figure S1.** Schematic illustration of rotator with (a-b) Cu as electrification layer (EL1), (c-d) FEP as electrification layer, and (e-f) Cu/FEP as electrification layer (EL1/EL2). (The scale bars are 2 cm)

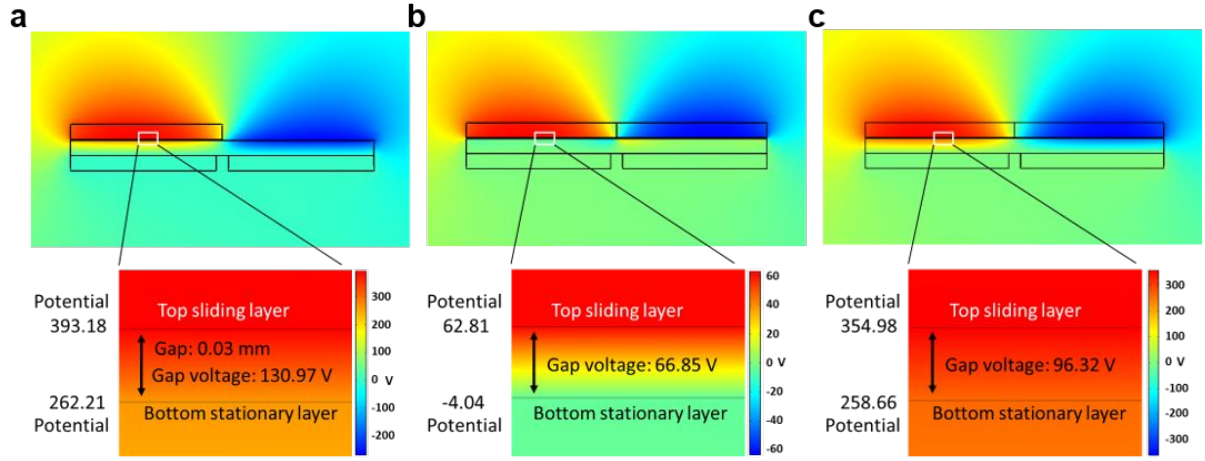

**Figure S2.** The simulation results of potential distribution between the two electrodes when the air gap is 0.03 mm. (a) EL1@EL3 based BEL-TENG, (b) The initial state of EL1/EL2@EL3 based TEL-TENG and (c) the saturated state of EL1/EL2@EL3 based TEL-TENG.

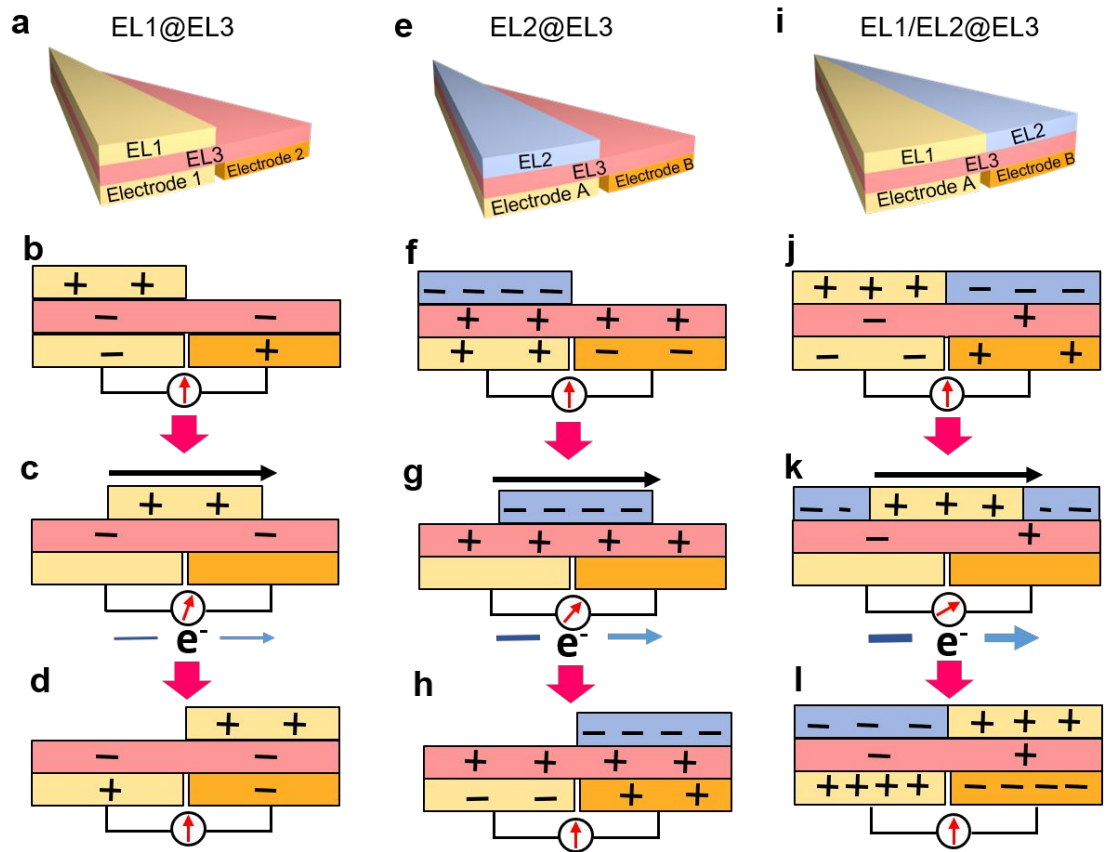

**Figure S3.** The operating principle of (a-d) EL1@EL3 based BEL-TENG, (e-h) EL2@EL3 based BEL-TENG and (i-l) EL1/EL2@EL3 based TEL-TENG.

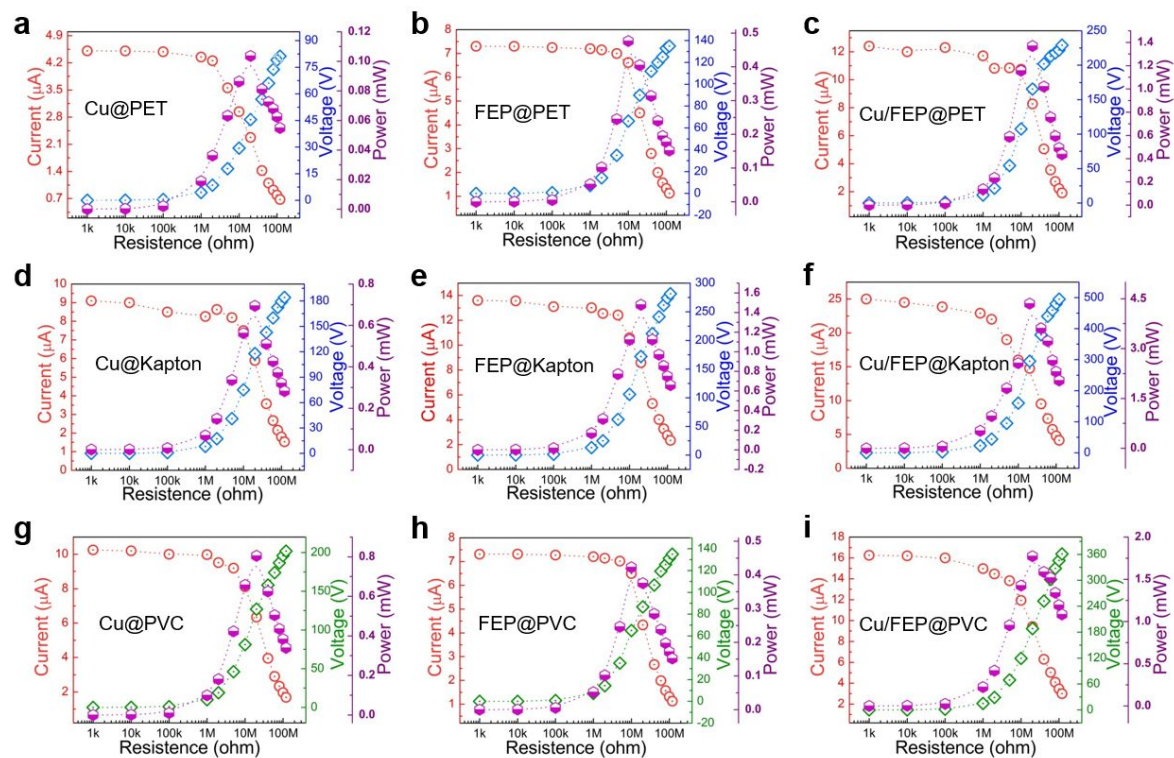

**Figure S4.** The output performance of BEL-TENG and the TEL-TENG with different intermediate electrification materials under variable external load resistances. (a-c) The performance of output power for the BEL-TENG and the TEL-TENG with PET as the intermediate material. (d-f) The performance of output power for the BEL-TENG and the TEL-TENG with Kapton as the intermediate material. (g-i) The performance of output power for the BEL-TENG and the TEL-TENG with PVC as the intermediate material. The unit center angle of  $60^\circ$  was used and the rotating speed of 600 rpm was fixed.

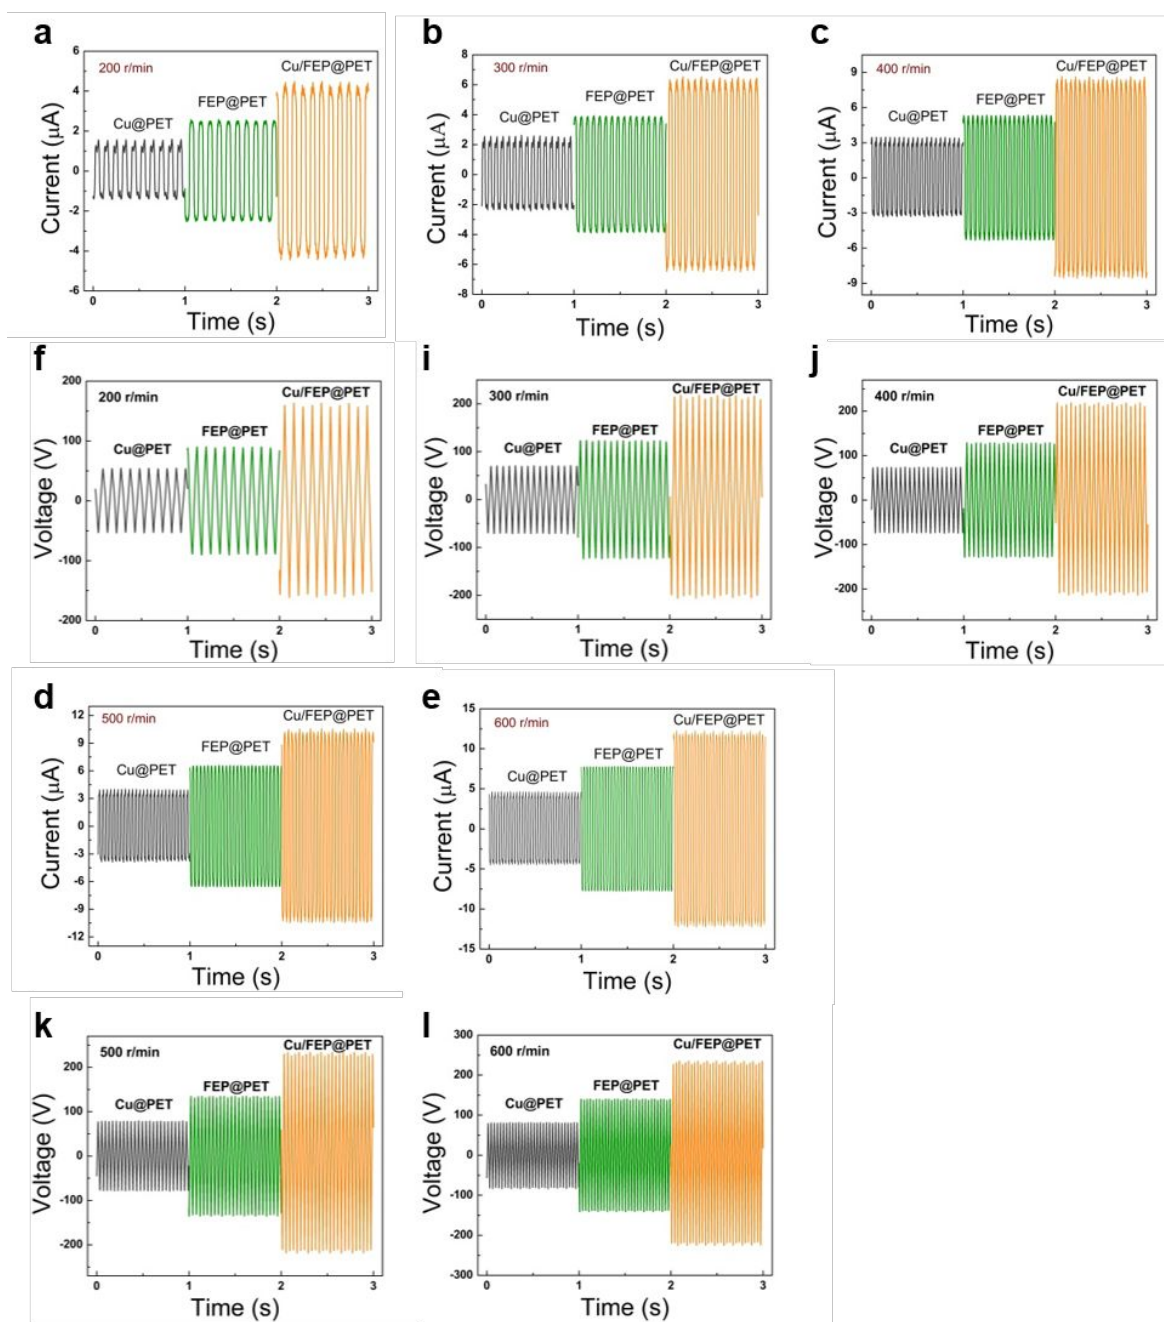

**Figure S5.** The electric output performance of short-circuit current (a-e) and voltage (f-l) for the BEL-TENG and the TEL-TENG with PET as the intermediate material. All of electric signals were measured at an external load resistance of 120 M $\Omega$  with a rotating speed of 600 rpm.



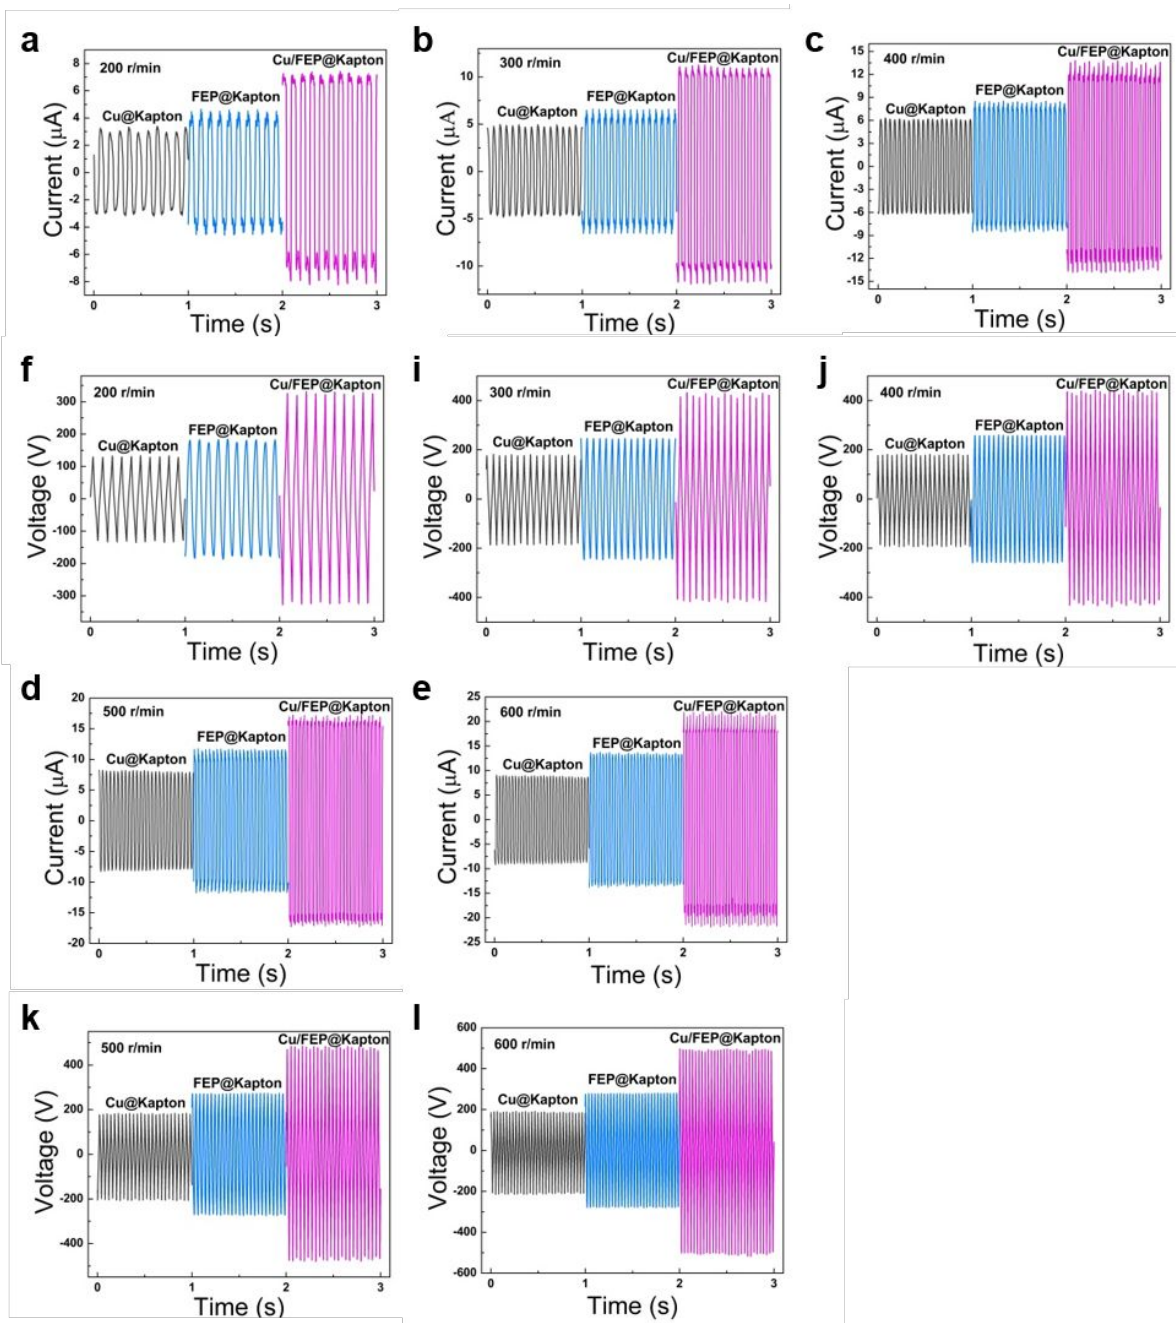

**Figure S6.** The electric output performance of short-circuit current (a-e) and voltage (f-l) for the BEL-TENG and the TEL-TENG with Kapton as the intermediate material. All of electric signals were measured at an external load resistance of  $120\text{ M}\Omega$  with a rotating speed of 600 rpm.

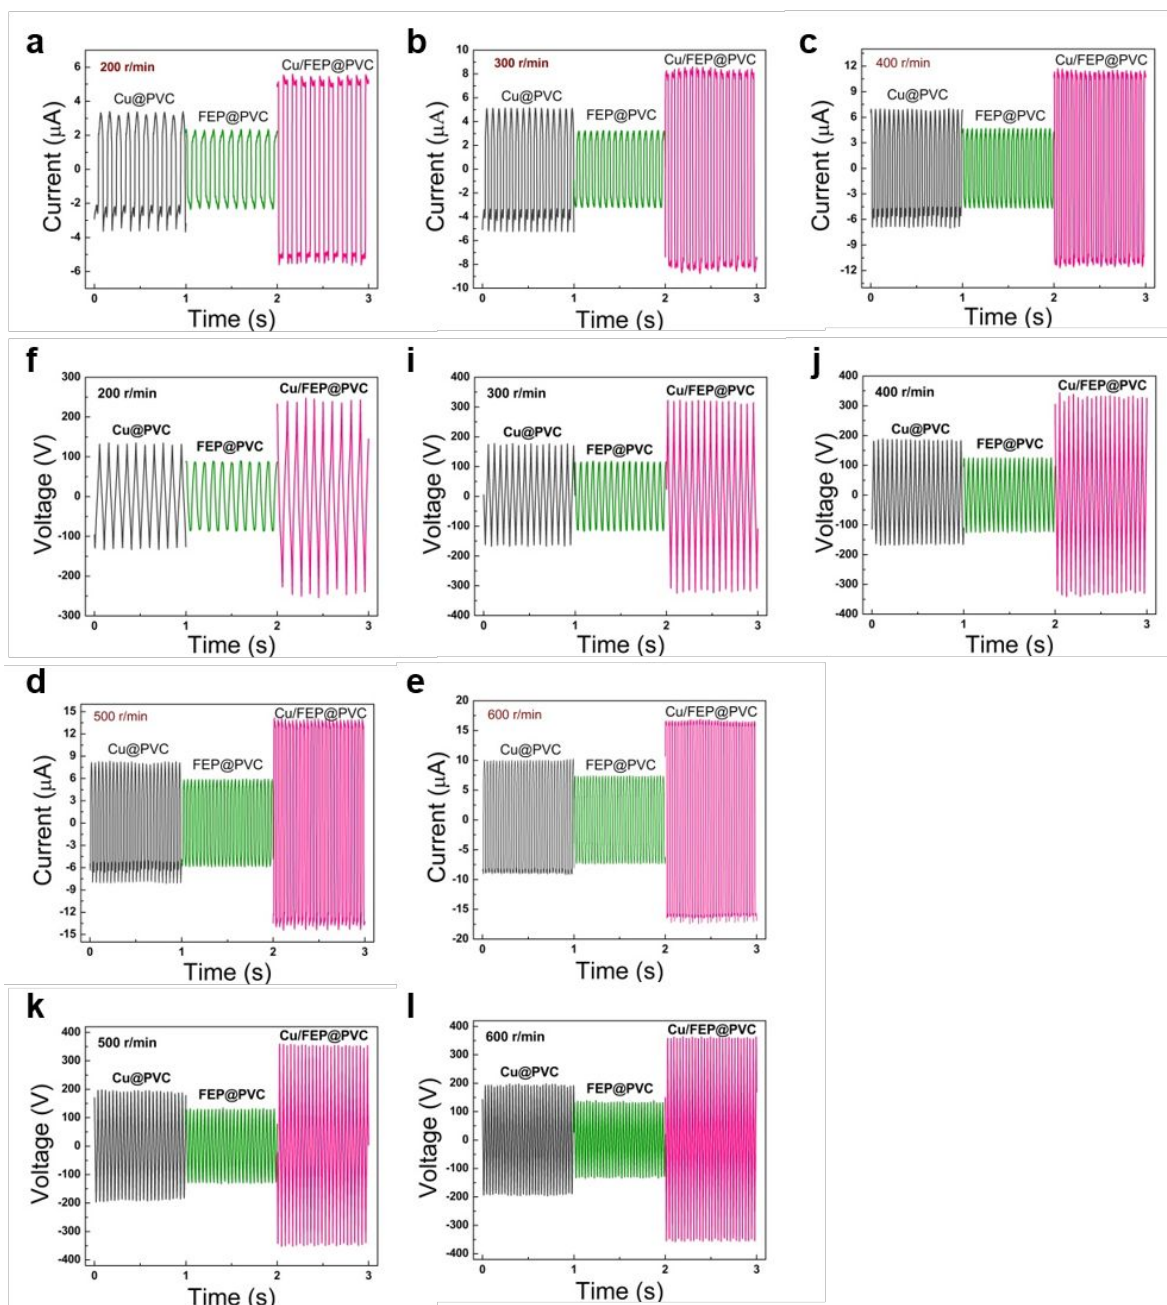

**Figure S7.** The electric output performance of short-circuit current (a-e) and voltage (f-l) for the BEL-TENG and the TEL-TENG with PVC as the intermediate material. All of electric signals were measured at an external load resistance of 120 MΩ with a rotating speed of 600 rpm.



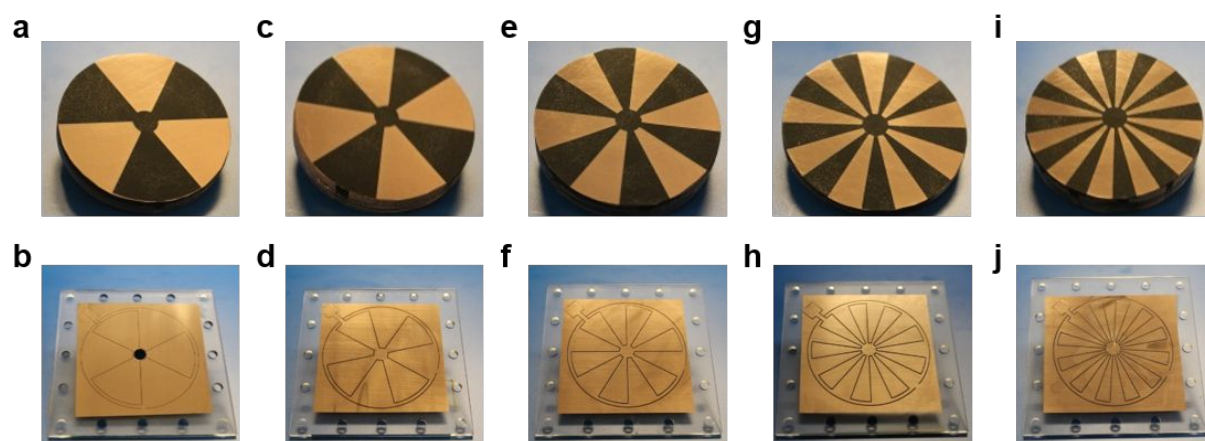

**Figure S8.** Corresponding photographs of stator and rotator with various unit center angles of (a-b) 60°, (c-d) 45°, (e-f) 30°, (g-h) 20°, and (i-j) 15°.

### Supporting Note 1:

We assume the gap between electrodes are ignored. The rotation disc was separated into  $2N$  parts ( $N$  is the number of blocks of each material). Then the signals should be periodically with period of  $2\pi/N$ . After contacting with interlayer, the rotation materials take charge density of  $2\sigma_1$  and  $-2\sigma_2$  ( $2\sigma_1$  and  $2\sigma_2$  are the charge density of each piece of the triboelectric material on the rotator, both  $\sigma_1, \sigma_2 \geq 0$ ), respectively. Therefore, the interlayer will totally take the charge density of  $2(\sigma_2 - \sigma_1) = -(2\sigma_1 - 2\sigma_2)$  to balance the total charge. Then the corresponding interlayer will take charge density of  $(\sigma_2 - \sigma_1)$ , respectively. The electric potential distributions are depicted in Figure 4. Firstly, we can set MACRS (Minimum achievable reference charge state)<sup>1</sup> as the state in Figure 4j. So at that time, the rotation angle  $\alpha = 0$ ,  $V_{OC}(0) = 0$ , and  $Q_{SC}(0) = 0$ . For the two other extreme status in Figure 4i and k, it has been reported the capacitance between the two electrodes can be considered as identical,<sup>1-3</sup> and we can assume it as  $C_p$ . When the radius of the rotator is  $R$ , therefore, the open-circuit voltages can be calculated by the short-circuit charge transfers over  $C_p$ :

The state of Figure 4i:  $\alpha = -\frac{\pi}{2N}$  or  $\frac{3\pi}{2N}$ ,  $Q_{SC} = -(\sigma_1 + \sigma_2)\frac{\pi R^2}{2}$ ,  $V_{OC} = -(\sigma_1 + \sigma_2)\frac{\pi R^2}{2C_p}$

The state of Figure 4k:  $\alpha = -\frac{3\pi}{2N}$  or  $\frac{\pi}{2N}$ ,  $Q_{SC} = (\sigma_1 + \sigma_2)\frac{\pi R^2}{2}$ ,  $V_{OC} = (\sigma_1 + \sigma_2)\frac{\pi R^2}{2C_p}$

These  $V_{OC}$  are the maximum and minimum values.

For an arbitrary  $\alpha$ , the short-circuit charge transfer ( $\alpha_0 = \pi/N$ ):

$$Q_{SC} = \begin{cases} \alpha(\sigma_1 + \sigma_2)NR^2, & -\frac{\pi}{2N} < \alpha < \frac{\pi}{2N} \\ (\alpha_0 - \alpha)(\sigma_1 + \sigma_2)NR^2, & \frac{\pi}{2N} < \alpha < \frac{3\pi}{2N} \end{cases}$$

Therefore, the short-circuit current:

$$I_{SC} = \frac{dQ_{SC}}{dt} = \begin{cases} \frac{d\alpha}{dt}(\sigma_1 + \sigma_2)NR^2, & -\frac{\pi}{2N} < \alpha < \frac{\pi}{2N} \\ -\frac{d\alpha}{dt}(\sigma_1 + \sigma_2)NR^2, & \frac{\pi}{2N} < \alpha < \frac{3\pi}{2N} \end{cases}$$

These  $I_{SC}$  are the maximum and minimum values.

For the TENG with only one material, we can get the corresponding  $V_{OC}$  and  $I_{SC}$  by simply setting the charge density of the other material as zero. Therefore, due to the proportional relations between  $V_{OC}$  or  $I_{SC}$  and  $(\sigma_1 + \sigma_2)$ , there will be:

$$V_{OC}(\text{two materials})_{\max} = V_{OC}(\text{material 1})_{\max} + V_{OC}(\text{material 2})_{\max}$$

$$V_{OC}(\text{two materials})_{\min} = V_{OC}(\text{material 1})_{\min} + V_{OC}(\text{material 2})_{\min}$$

$$I_{SC}(\text{two materials})_{\max} = I_{SC}(\text{material 1})_{\max} + I_{SC}(\text{material 2})_{\max}$$

$$I_{SC}(\text{two materials})_{\min} = I_{SC}(\text{material 1})_{\min} + I_{SC}(\text{material 2})_{\min}$$

### Supporting References:

- (1) Niu, S.; Liu, Y.; Chen, X.; Wang, S.; Zhou, Y. S.; Lin, L.; Xie, Y.; Wang, Z. L. Theory of Freestanding Triboelectric-Layer-Based Nanogenerators. *Nano Energy* **2015**, *12*, 760-774.
- (2) Jiang, T.; Chen, X.; Han, C. B.; Tang, W.; Wang, Z. L. Theoretical Study of Rotary Freestanding Triboelectric Nanogenerators. *Adv. Funct. Mater.* **2015**, *25*, 2928-2938.
- (3) Wang, S.; Xie, Y.; Niu, S.; Lin, L.; Wang, Z. L. Freestanding Triboelectric-Layer-Based Nanogenerators for Harvesting Energy from a Moving Object or Human Motion in Contact and Non-Contact Modes. *Adv. Mater.* **2014**, *26*, 2818-2824.

## Supporting Table 1

Triboelectric table (tests were performed by Bill Lee (Ph.D., physics). ©2009 by AlphaLab, Inc. (TriField.com), which also manufactured the test equipment used. Column 1: Insulator name. Column 2: Charge affinity in nC/J. Column 3: Notes.

|                                                       |      |                                                         |
|-------------------------------------------------------|------|---------------------------------------------------------|
| Polyurethane foam                                     | +60  |                                                         |
| Sorbothane                                            | +58  | Slightly conductive. (120 G ohm cm).                    |
| Box sealing tape (BOPP)                               | +55  | More negative if sanded down to the BOPP film.          |
| Hair, oily skin                                       | +45  | Skin is conductive. Cannot be charged by metal rubbing. |
| Solid polyurethane, filled                            | +40  | Slightly conductive. (8 T ohm cm).                      |
| Magnesium fluoride (MgF <sub>2</sub> )                | +35  | Anti-reflective optical coating.                        |
| Nylon, dry skin                                       | +30  | Skin is conductive. Cannot be charged by metal rubbing. |
| Machine oil                                           | +29  |                                                         |
| Nylatron (nylon filled with MoS <sub>2</sub> )        | +28  |                                                         |
| Glass (soda)                                          | +25  | Slightly conductive. (Depends on humidity).             |
| Paper (uncoated copy)                                 | +10  | Slightly conductive.                                    |
| Wood (pine)                                           | +7   |                                                         |
| GE brand Silicone II (hardens in air)                 | +6   | More positive than the other silicone chemistry.        |
| Cotton                                                | +5   | Slightly conductive. (Depends on humidity).             |
| Nitrile rubber                                        | +3   |                                                         |
| Wool                                                  | 0    |                                                         |
| Polycarbonate                                         | -5   |                                                         |
| ABS                                                   | -5   |                                                         |
| Acrylic (polymethyl methacrylate)                     | -10  |                                                         |
| Epoxy (circuit board)                                 | -32  |                                                         |
| Styrene-butadiene rubber (SBR, Buna S)                | -35  | Sometimes inaccurately called "neoprene" (see below).   |
| Solvent-based spray paints                            | -38  | May vary.                                               |
| PET (mylar) cloth                                     | -40  |                                                         |
| PET (mylar) solid                                     | -40  |                                                         |
| EVA rubber for gaskets, filled                        | -55  | Filled rubber will usually conduct.                     |
| Gum rubber                                            | -60  | Barely conductive. (500 T ohm cm).                      |
| Hot melt glue                                         | -62  |                                                         |
| Polystyrene                                           | -70  |                                                         |
| Polyimide                                             | -70  |                                                         |
| Silicones (air harden & thermoset, but <i>not</i> GE) | -72  |                                                         |
| Vinyl: flexible (clear tubing)                        | -75  |                                                         |
| Carton-sealing tape (BOPP)                            | -85  | Raw surface is very +, but close to PP when sanded.     |
| Olefins (alkenes): LDPE, HDPE, PP                     | -90  | UHMWPE is below.                                        |
| Cellulose nitrate                                     | -93  |                                                         |
| Office tape backing                                   | -95  |                                                         |
| UHMWPE                                                | -95  |                                                         |
| Neoprene (polychloroprene, <i>not</i> SBR)            | -98  | Slightly conductive if filled (1.5 T ohm cm).           |
| PVC (rigid vinyl)                                     | -100 |                                                         |
| Latex (natural) rubber                                | -105 |                                                         |
| Viton, filled                                         | -117 | Slightly conductive. (40 T ohm cm).                     |
| Epichlorohydrin rubber, filled                        | -118 | Slightly conductive. (250 G ohm cm).                    |
| Santoprene rubber                                     | -120 |                                                         |
| Hypalon rubber, filled                                | -130 | Slightly conductive. (30 T ohm cm).                     |

---

|                      |      |                                                   |
|----------------------|------|---------------------------------------------------|
| Butyl rubber, filled | -135 | Conductive. (900 M ohm cm). Test was done fast.   |
| EDPM rubber, filled  | -140 | Slightly conductive. (40 T ohm cm).               |
| PTFE (Teflon)        | -190 | Surface is fluorine atoms-- very electronegative. |
